# Supplementary material for: Blockade of the pro‐fibrotic reaction mediated by the miR‐143/‐145 cluster enhances the responses to targeted therapy in melanoma
Source: PubMed Central journal article supplement (PMC8899916; doi:10.15252/emmm.202115295), 2022-02-14
Supplement: EMMM-14-e15295-s001.pdf [file EMMM-14-e15295-s001.pdf]

## **Appendix**

### **Table of contents**

Appendix Figure S1

Appendix Figure S2

Appendix Figure S3

Appendix Figure S4

Appendix Figure S5

Appendix Figure S6

Appendix Figure S7

Appendix Table S1

Appendix Table S2

Appendix Table S3

Appendix Table S4

Appendix Table S5

Appendix Table S6

Appendix Table S7

References

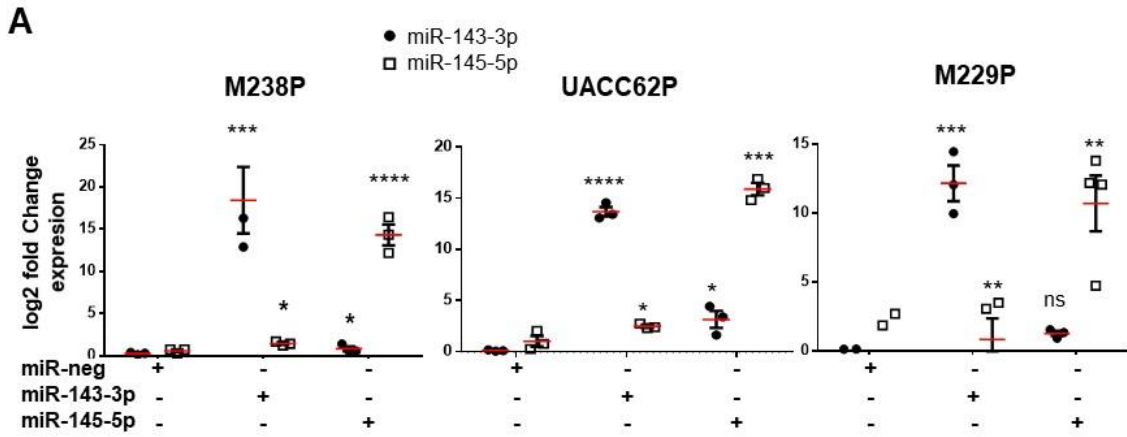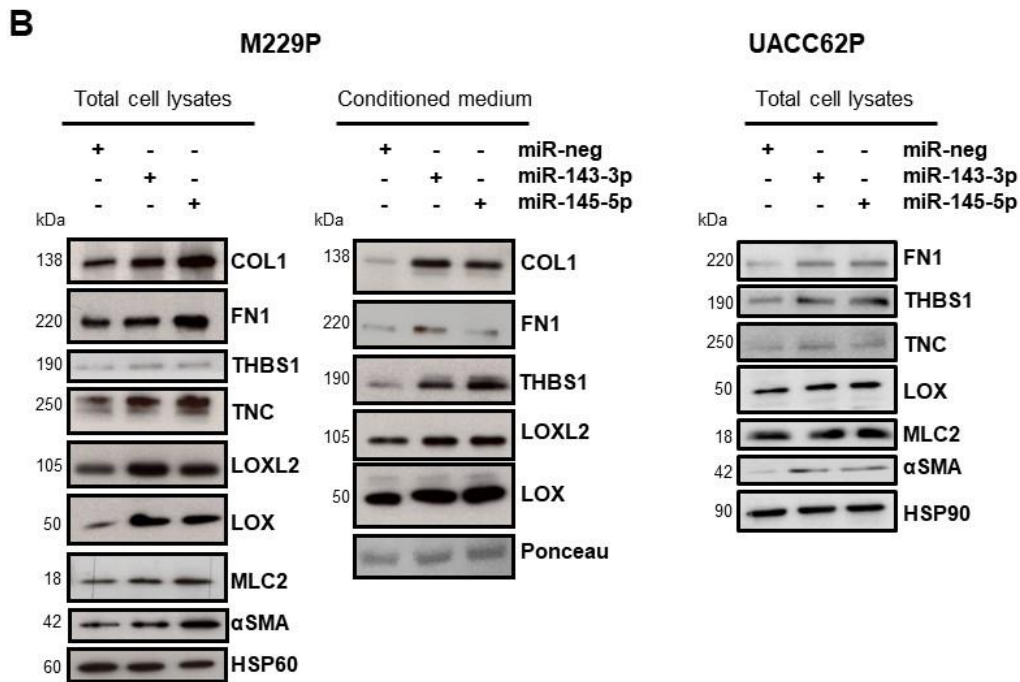

**Appendix Figure S1. The miR-143/-145 cluster plays a role in ECM reprogramming.** (A) qPCR analysis showing the level of miR-143-3p and miR-145-5p expression after transient transfection of miRNAs mimics (72 h, 30 nM) in 3 distinct melanoma cell lines (M238P, UACC62P, M229P). Data is represented as mean  $\pm$  SE from a triplicate representative of at least 3 independent experiments. Paired Student t-test has been used for statistical analysis. \* $P \leq 0.05$  \*\* $P \leq 0.01$  \*\*\* $P \leq 0.001$  \*\*\*\* $P \leq 0.0001$  (B) Immunoblot analysis of ECM remodeling markers on total cell lysates (M229P and UACC62P) or conditioned medium (M229P) from parental cells transfected with the indicated mimics.

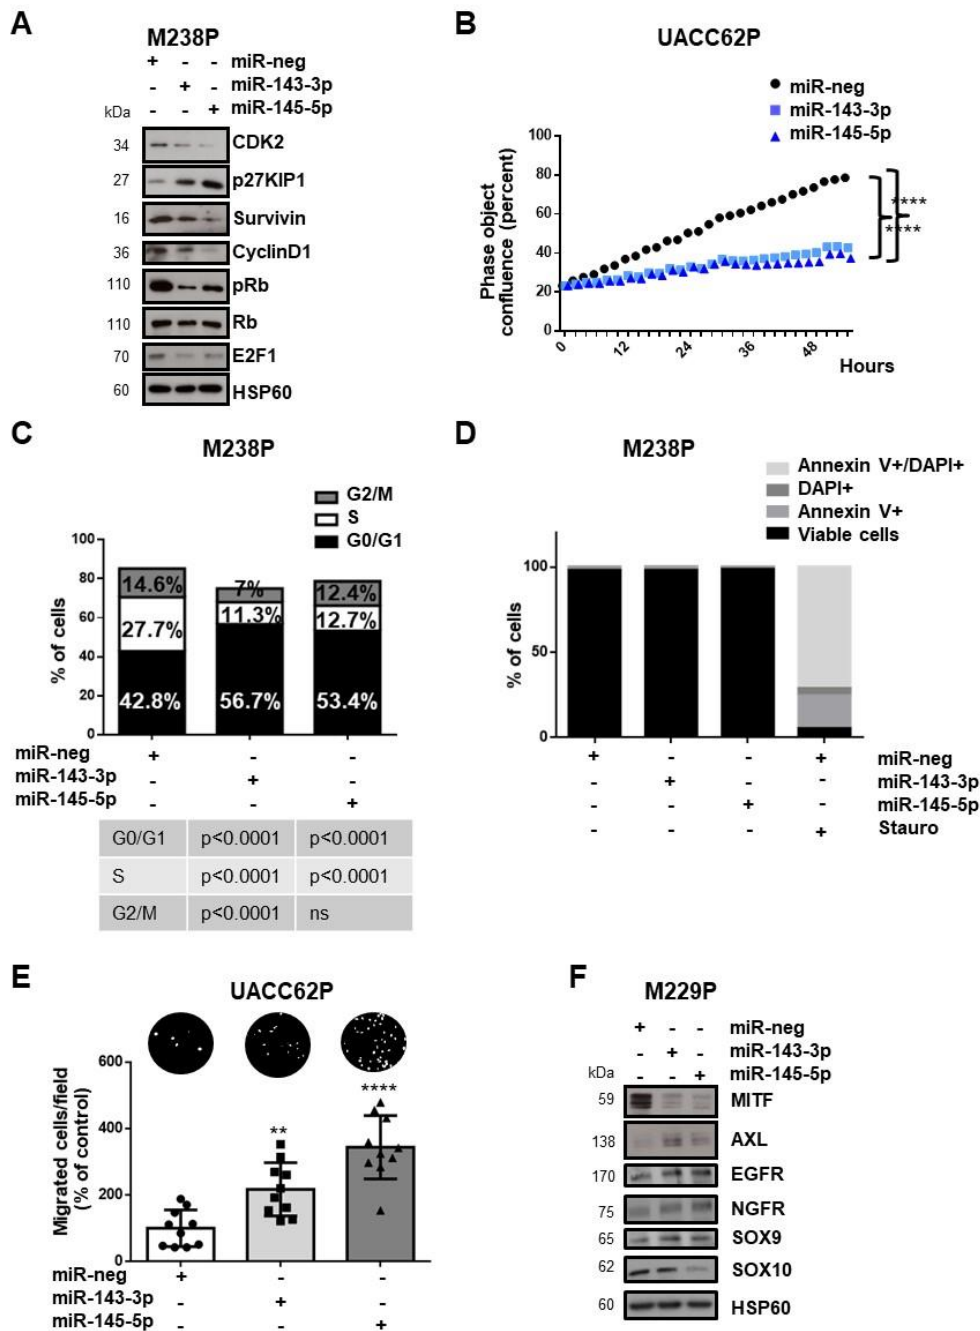

**Appendix Figure S2. The miR-143/-145 cluster drives melanoma cell plasticity and dedifferentiation.**

Melanoma cells were transfected with control (miR-neg), miR-143 or miR-145 mimics (72 h, 30 nM). **(A)** Immunoblot analysis of cell cycle markers on lysates from M238P cells. **(B)** Proliferation curves of parental cells (UACC62P) following transient transfection with miRNA mimics. Time-lapse analysis of cells has been performed with the IncuCyte system. Graph shows quantification of cell confluence. Two-way ANOVA analysis has been used for statistical analysis. \*\*\*\* $P \leq 0.0001$ . **(C)** Cell cycle distribution of cells cultured in the different conditions. Histograms represent the percentage of cells in different phases of the cell cycle. **(D)** Flow cytometry analysis of cell death (Annexin V/DAPI labelling) in M238P cells following transient transfection with miRNAs mimics or staurosporine treatment (Stauro, 1  $\mu\text{g}/\text{mL}$ , 24 h). Histograms represent the percentage of non-stained/stained cells. **(E)** Migration assay of melanoma cells (UACC62P) following transient transfection with miRNA mimics in Boyden chambers. Representative images show migration in control and miR-143-3p or miR-145-5p transfected cells. The histogram represents the quantitative determination of data obtained using ImageJ software. Paired Student t-test has been used for statistical analysis. \*\* $P \leq 0.01$ , \*\*\*\* $P \leq 0.0001$ . **(F)** Immunoblot analysis of phenotype switch markers on lysates from M229P cells transfected with the indicated mimics.

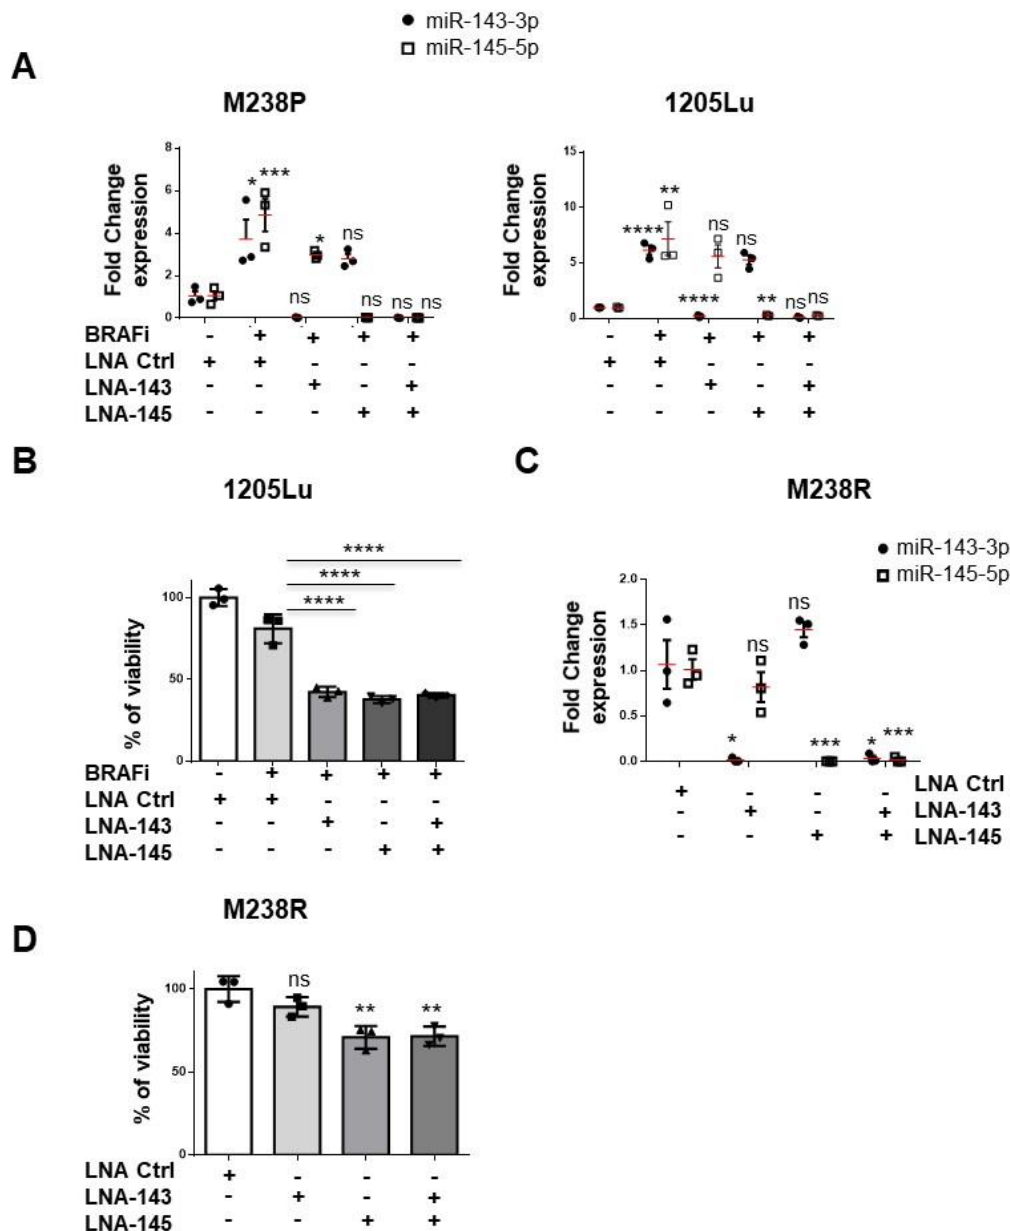

**Appendix Figure S3. miR-143 and miR-145 inhibition reverses the adaptive response of melanoma cells to MAPK pathway inhibition.** Cells were treated with BRAFi (Vemurafenib, 3  $\mu$ M) in the presence or the absence of anti-miR inhibitors (50 nM) for 72 h. **(A)** RT-qPCR analysis of miR-143-3p and miR-145-5p expression in parental cells (M238P and 1205Lu) treated with the different combinations of inhibitors. Data is represented as mean  $\pm$  SE from a triplicate representative of at least 3 independent experiments. Paired Student t-test has been used for statistical analysis. \* $P \leq 0.05$ , \*\* $P \leq 0.01$ , \*\*\* $P \leq 0.001$ , \*\*\*\* $P \leq 0.0001$ . **(B)** Crystal violet viability assay of 1205Lu cells treated 72 h with the indicated combinations of inhibitors. Data is represented as mean  $\pm$  SD from a triplicate representative of at least 3 independent experiments. One-way ANOVA has been used for statistical analysis. \*\*\*\* $P \leq 0.0001$ . **(C)** RT-qPCR analysis of miR-143-3p and miR-145-5p expression in resistant M238R cells treated with the different combinations of inhibitors. Data is represented as mean  $\pm$  SE from a triplicate representative of at least 3 independent experiments. Paired Student t-test has been used for statistical analysis. \* $P \leq 0.05$ , \*\*\* $P \leq 0.001$ . **(D)** Crystal violet viability assay of M238R cells treated 72 h with the indicated combinations of inhibitors (50 nM). Data is represented as mean  $\pm$  SD from a triplicate representative of at least 3 independent experiments. One-way ANOVA has been used for statistical analysis. \*\* $P \leq 0.01$ .

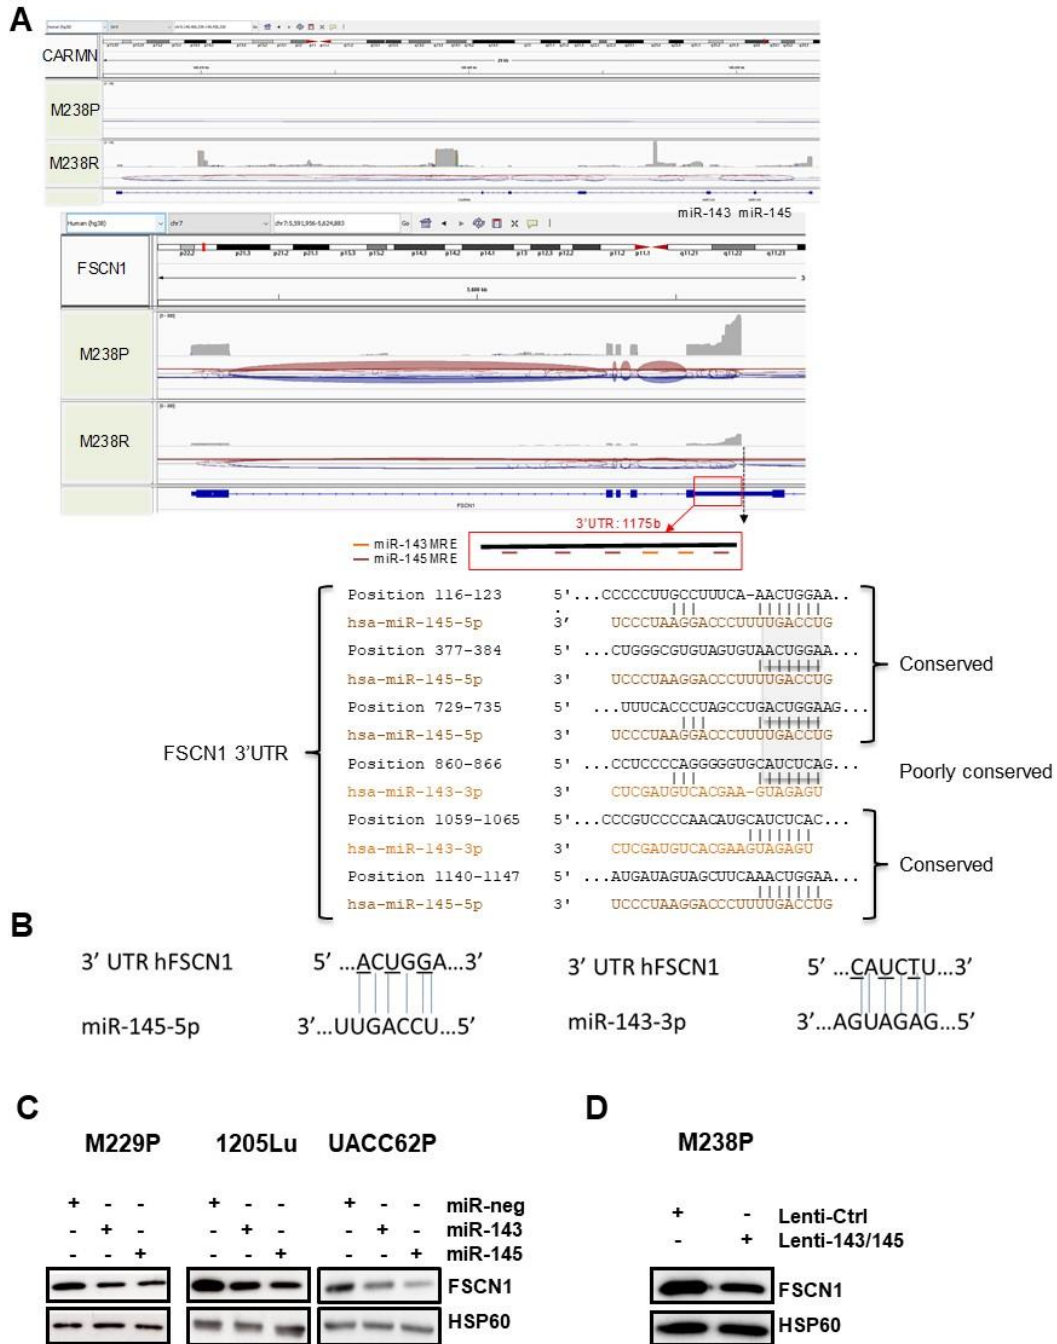

**Appendix Figure S4. Characterization of the transcripts produced from the miR-143/-145 cluster and FSCN1 loci in parental and mesenchymal resistant melanoma cells.** (A) Screenshot from Integrative Genomic Viewer (IGV) displaying nanopore long-reads RNA-Seq data of the miR-143/-145 cluster / CARMN and FSCN1 loci in M238P and M238R cells (dataset 3, n=1). A strong increase of total reads associated with the CARMN transcripts in M238R compared to M238P cells is shown while the FSCN1 transcript shows the opposite pattern. The red box highlights the FSCN1 3'UTR containing 2 and 4 predicted sites for miR-143-3p and miR-145-5p, respectively. The sequence, pairing and conservation are shown for each predicted site. (B) Sequence of hFSCN1 3'UTR miR-143 or miR-145 recognition elements and pairing with miR-143 or miR-145 seeds. Bases mutated in the plasmid used for luciferase assay are underlined. (C-D) Western Blot analysis of FSCN1 expression in M229P, 1205Lu, and UACC62P cells transfected with the indicated miRNA mimics (72 h, 30 nM) (C) and in M238P cells transduced with the indicated construct (D).

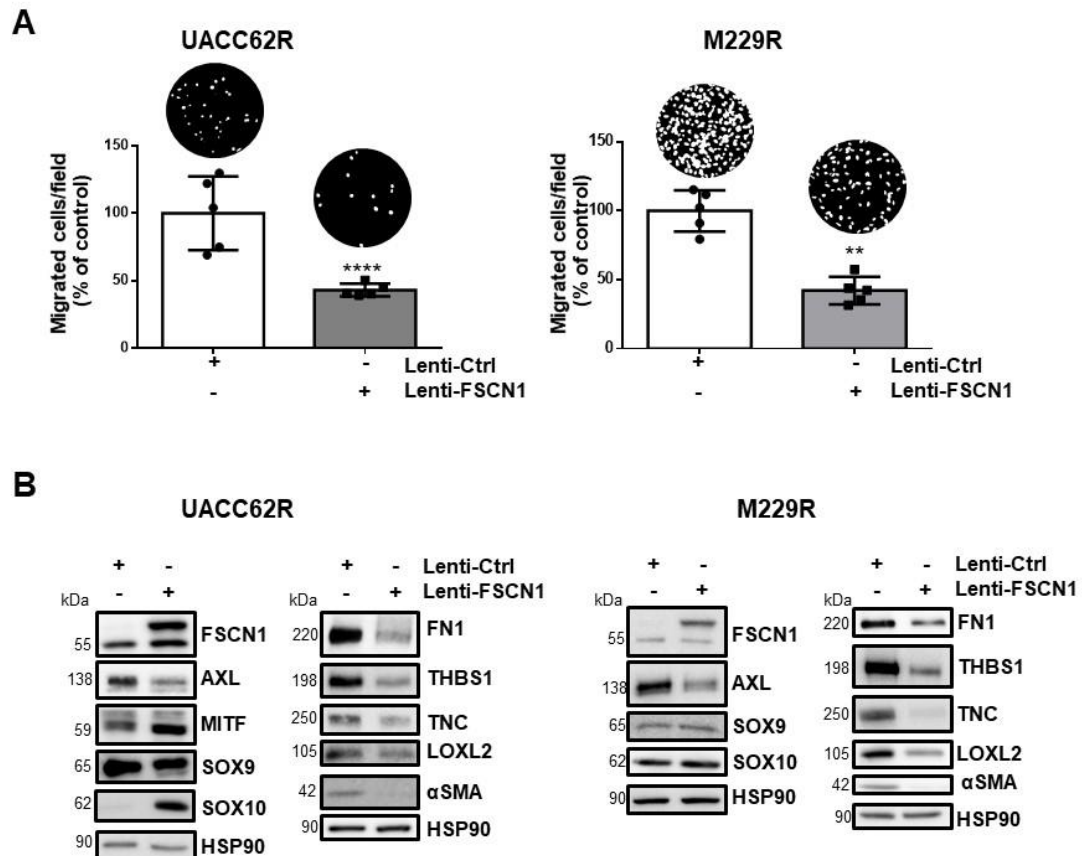

**Appendix Figure S5. FSCN1 restoration promotes the switch of melanoma cells toward a differentiated cell state. (A-B)** Cells were transduced with a control or a FSCN1 lentiviral construct. **(A)** Effect of FSCN1 overexpression on cell migration (Boyden chambers). Representative images and quantitative determination of data obtained using ImageJ software. Paired Student t-test has been used for statistical analysis.  $**P \leq 0.01$ ,  $****P < 0.0001$ . **(B)** Immunoblot analysis of phenotype switch markers and ECM remodeling markers on cell lysates from control and FSCN1 overexpressing resistant cells (UACC62R, M229R).

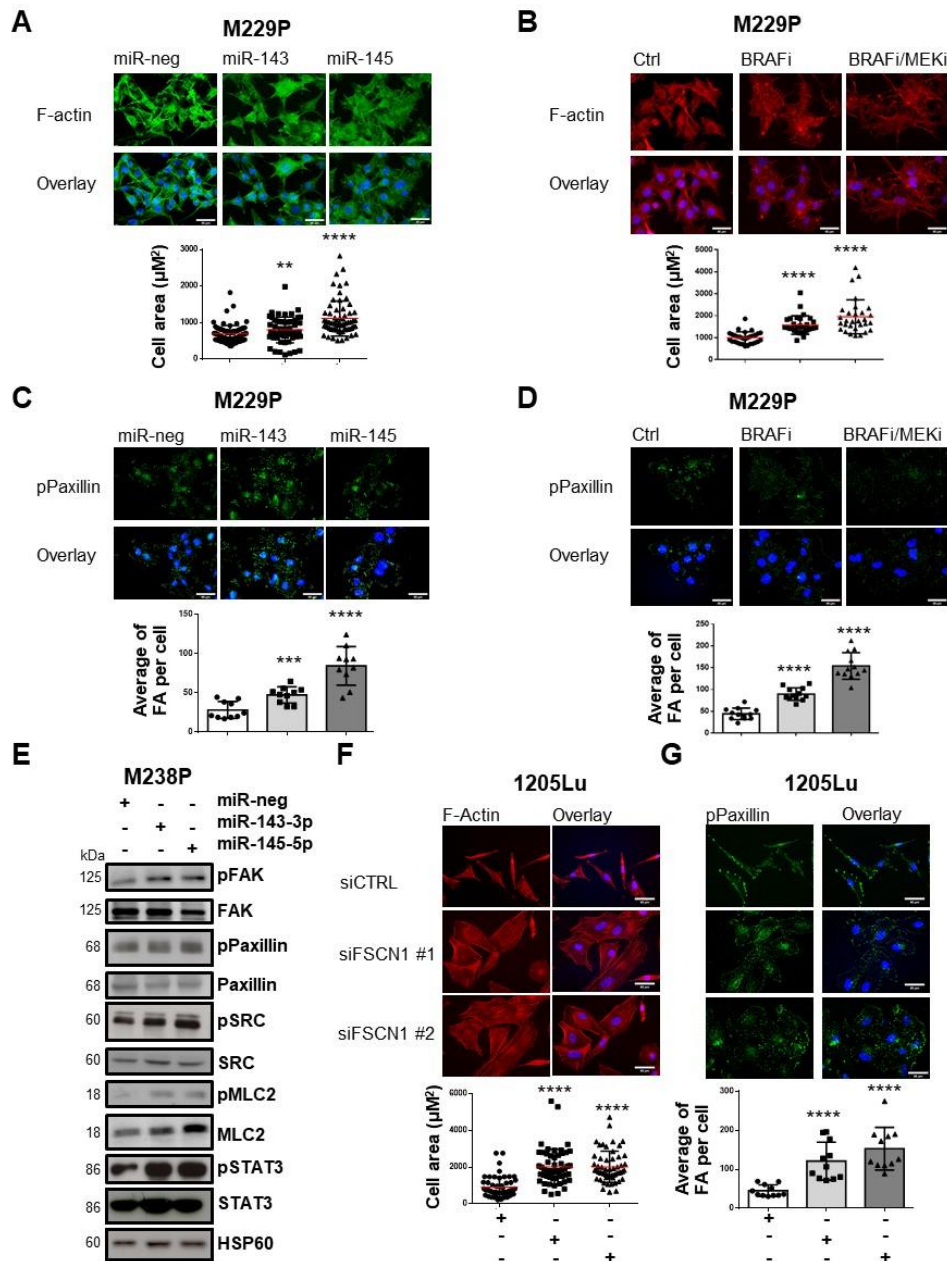

**Appendix Figure S6. The miR-143/-145 cluster / FSCN1 axis regulates actin cytoskeleton dynamics. (A-C)** M229P cells were transfected with miR-143-3p, miR-145-5p or a control mimic (72 h, 30nM). **(B-D)** M229P cells were treated 72 h with BRAFi (Vemurafenib 3 µM) or a combination of BRAFi (0.5 µM) and MEKi (Trametinib, 1 µM). **(A-B)** Images and quantification of cell area in cells stained for F-actin (green) and nuclei (blue). Data is represented as scatter plot with mean ± SD (n≥30 cells per condition). Mann-Whitney U test has been used for statistical analysis. \*\*P≤0.01, \*\*\*\*P≤0.0001. Scale bar 40 µm. **(C-D)** Images and quantification of focal adhesions (FA) number in cells stained for pPaxillin (green) and nuclei (blue). Focal adhesions number is represented as mean ± SD (n≥30 cells per condition). Each point represents the average number of focal adhesions per cell calculated for each field. Paired Student t-test has been used for statistical analysis. \*\*\*P≤0.001, \*\*\*\*P≤0.0001. Scale bar 40 µm. **(E)** Immunoblot analysis of focal adhesion components and cytoskeleton-related pathways in M238P cells transfected with the different mimics. (30 nM, 72 h). **(F-G)** 1205Lu cells were transfected with two different sequences of siRNAs vs FSCN1 or with a control siRNA (72 h, 100 nM). **(F)** Images and quantification of cell area in cells stained for F-Actin (red) and nuclei (blue). Data is represented as scatter plot with mean ± SD. (n≥30 cells per condition). Mann-Whitney U test has been used for statistical analysis. \*\*\*\*P≤0.0001. Scale bar 40 µm. **(G)** Images and quantification of focal adhesions (FA) number in cells stained for pPaxillin (green) and nuclei (blue). Focal adhesions number is represented as mean ± SD (n≥30 cells per condition). Each point represents the average number of focal adhesions per cell calculated for each field. Mann-Whitney U test has been used for statistical analysis. \*\*\*\*P≤0.0001. Scale bar 40 µm.

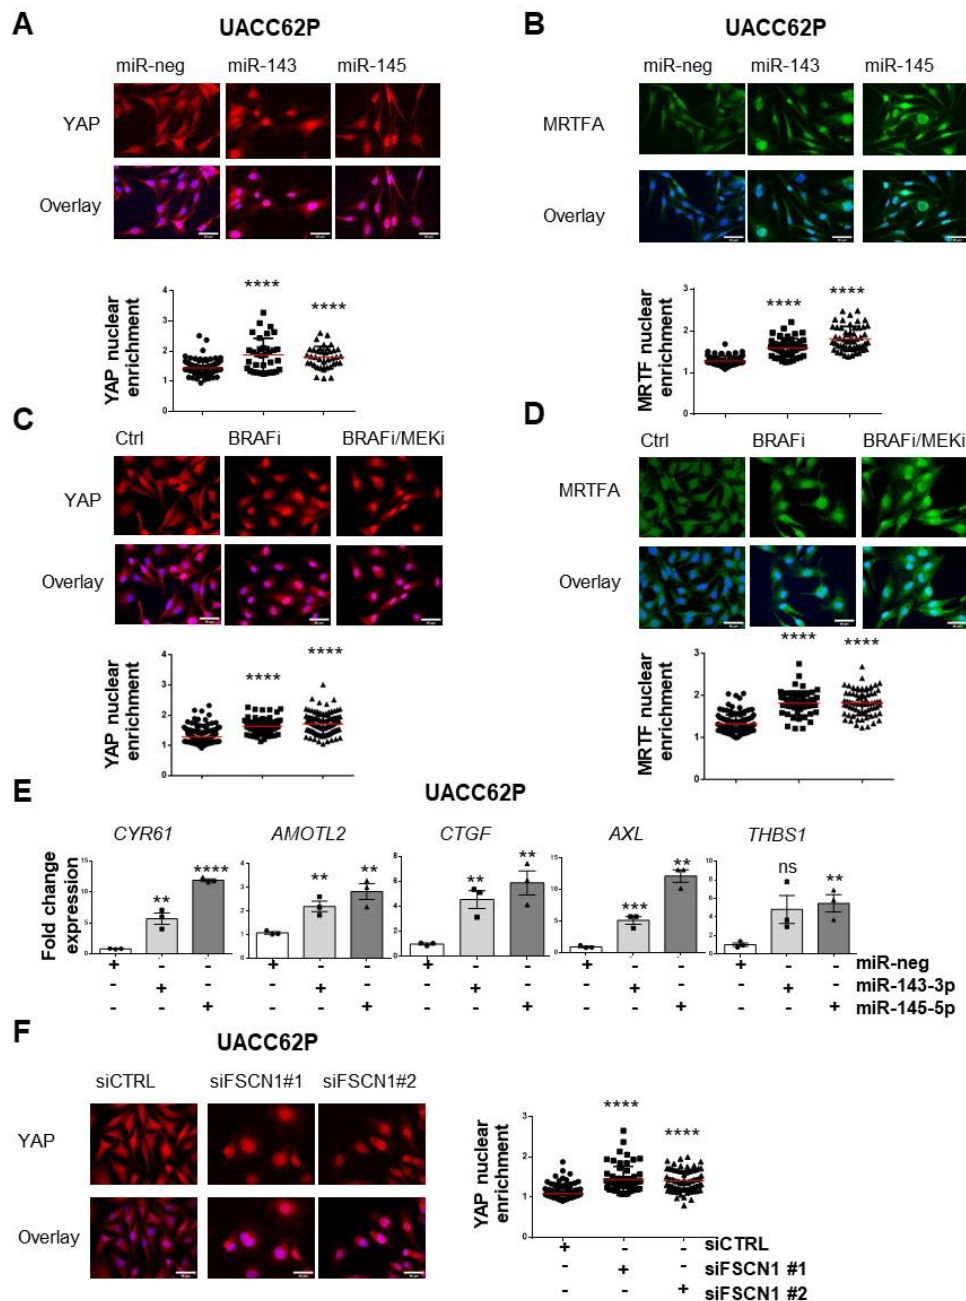

**Appendix Figure S7. The miR-143/-145 cluster / FSCN1 axis regulates mechanopathways. (A-B)** UACC62P cells were transfected with miR-143-3p, miR-145-5p or a control mimic (72 h, 30 nM). Effect of miR-143 or miR-145 overexpression on YAP (A) or MRTFA (B) nuclear translocation assessed by immunofluorescence. Cells were stained for YAP (red) or MRTFA (green) and nuclei (blue). (C-D) UACC62P cells were treated 72 h with BRAFi (Vemurafenib, 3  $\mu$ M) or a combination of BRAFi (0.5  $\mu$ M) and MEKi, (Trametinib, 1  $\mu$ M). Effect of MAPKi on YAP (C) or MRTFA (D) nuclear translocation by immunofluorescence. Cells were stained for YAP (red) or MRTFA (green) and nuclei (blue). (A-B-C-D) Data are represented as scatter plot with mean  $\pm$  SD ( $n \geq 30$  cells per condition). Each point represents the nuclear/cytoplasm ratio. Mann-Whitney U test has been used for statistical analysis. \*\*\*\* $P \leq 0.0001$ . Scale bar 40  $\mu$ m. (E) Effect of miR-143 or miR-145 overexpression (72h, 30 nM) on the expression of MRTFA/YAP target genes assessed by RT-qPCR. Data are normalized to the expression in control cells. Data is represented as mean  $\pm$  SE from a triplicate representative of at least 3 independent experiments. Paired Student t-test has been used for statistical analysis. \*\* $P \leq 0.01$ , \*\*\* $P \leq 0.001$ , \*\*\*\* $P \leq 0.0001$ . (F) Effect of FSCN1 knockdown on YAP nuclear translocation assessed by immunofluorescence in UACC62P cells transfected with the indicated siRNA. Cells were stained for YAP (red) and nuclei (blue). Data are represented as scatter plot with mean  $\pm$  SD ( $n \geq 30$  cells per condition). Each point represents the nuclear/cytoplasm ratio. Mann-Whitney U test has been used for statistical analysis. \*\*\*\* $P \leq 0.0001$ .



**Appendix Table S1. List of themes corresponding to “Molecular functions” annotations associated with miR-143-3p and miR-145-5p mimics overexpression in human M238P melanoma cells identified by Ingenuity Pathway Analysis.**

M238P cells were transfected with miR-143, miR-145 or a control mimic (72 h, 30 nM). Expression profiles were determined with Agilent whole genome microarrays (Dataset 1). Z-scores calculated for each pathway (miR-143-3p or miR-145-5p vs miR-Neg) are indicated. Significant pathways are shown in progressively brighter shades of blue (repression) and orange (activation) according to their significance.

| Molecular Functions                    | - Log10 (P Val) |            |
|----------------------------------------|-----------------|------------|
|                                        | miR-143-3p      | miR-145-5p |
| Migration of cells                     | 12.13           | 15.13      |
| Cell movement                          | 11.08           | 14.26      |
| Cell proliferation of tumor cell lines | 11.80           | 11.09      |
| Invasion of cells                      | 10.24           | 8.80       |
| Migration of tumor cell lines          | 10.46           | 7.65       |
| Cell movement of tumor cell lines      | 8.93            | 9.02       |
| Organization of cytoplasm              | 8.27            | 9.26       |
| Organization of cytoskeleton           | 6.44            | 10.13      |
| Necrosis                               | 10.62           | 5.59       |
| Apoptosis                              | 10.07           | 5.72       |
| Cell death of tumor cell lines         | 10.28           | 4.99       |
| Invasion of tumor cell lines           | 9.31            | 5.86       |
| Cell survival                          | 8.75            | 5.23       |
| Cell viability                         | 8.90            | 4.96       |
| Microtubule dynamics                   | 4.54            | 9.04       |
| Cell cycle progression                 | 8.08            | 4.99       |
| Apoptosis of tumor cell lines          | 6.70            | 4.56       |
| Cell viability of tumor cell lines     | 6.02            | 4.61       |
| Phosphorylation of protein             | 3.60            | 6.83       |
| Sprouting                              | 3.61            | 6.61       |
| Formation of cellular protrusions      | 0.00            | 10.05      |
| Colony formation of cells              | 6.12            | 3.70       |
| Biosynthesis of amide                  | 3.80            | 5.76       |
| Migration of cancer cells              | 0.00            | 9.02       |
| Migration of tumor cells               | 0.00            | 8.84       |
| Cell movement of tumor cells           | 0.00            | 8.82       |
| Interphase                             | 8.15            | 0.00       |
| DNA replication                        | 7.64            | 0.00       |
| Transmigration of cells                | 0.00            | 7.62       |
| Arrest in interphase                   | 6.86            | 0.00       |
| G1/S phase transition                  | 6.81            | 0.00       |
| G1 phase                               | 6.70            | 0.00       |
| Mitosis                                | 6.58            | 0.00       |
| Metabolism of DNA                      | 6.21            | 0.00       |
| Synthesis of DNA                       | 6.20            | 0.00       |
| Damage of chromosomes                  | 6.00            | 0.00       |
| Metabolism of reactive oxygen species  | 5.44            | 0.00       |
| Chromosomal aberration                 | 5.37            | 0.00       |
| Entry into interphase                  | 5.30            | 0.00       |
| Chromosomal instability                | 5.23            | 0.00       |
| Arrest in mitosis                      | 5.23            | 0.00       |
| Synthesis of glycosaminoglycan         | 0.00            | 5.19       |
| Secretion of molecule                  | 0.00            | 5.16       |
| Synthesis of lipid                     | 0.00            | 5.16       |

**Appendix Table S2. List of the main predicted targets for miR-143-3p and miR-145-5p significantly downregulated following mimics overexpression in human M238P melanoma cells using the bioinformatics tool miRonTop.**

M238P cells were transfected with miR-143, miR-145 or a control mimic (48 h, 30 nM). Expression profiles were determined with Agilent whole genome microarrays (Dataset 1). Predicted targets were obtained using the bioinformatics tool miRonTop (<https://www.genomique.info:8443/merge/index>) (Le Brigand et al., 2010) based on the Targetscan database (conserved sites) ([www.targetscan.org](http://www.targetscan.org)) (Agarwal et al., 2015). Av.Exp: logarithm (base 2) of the average intensity ; logFC: logarithm (base 2) of the ratio of miR-143-3p or miR-145-5p vs miR-Neg; Adj.pVal: Benjamini-Hochberg adjusted pValue. The thresholds used for the analysis are: Av.Exp >6, LogFC < -1 and adj.pVal < 0.05.

| miR-143-3p predicted targets |        |       |          | miR-145-5p predicted targets |        |       |          |
|------------------------------|--------|-------|----------|------------------------------|--------|-------|----------|
| Symbol                       | Av.Exp | LogFC | Adj.pVal | Symbol                       | Av.Exp | LogFC | Adj.pVal |
| ABHD14A                      | 11.92  | -1.27 | 5.62E-05 | ABCE1                        | 9.99   | -1.25 | 1.09E-04 |
| ADD3                         | 9.14   | -1.20 | 3.48E-05 | ADAM19                       | 10.63  | -1.52 | 1.07E-05 |
| ASAP3                        | 6.68   | -1.29 | 3.10E-05 | ADD3                         | 9.14   | -1.87 | 6.14E-07 |
| ATP6V1A                      | 12.26  | -1.17 | 4.49E-05 | ADPGK                        | 9.60   | -1.73 | 1.37E-06 |
| BCL2                         | 6.29   | -1.14 | 1.07E-04 | AKAP12                       | 7.28   | -1.64 | 3.69E-06 |
| CDK1                         | 9.61   | -1.14 | 5.44E-05 | AKAP9                        | 10.57  | -1.03 | 1.06E-04 |
| CNNM3                        | 6.94   | -1.32 | 3.35E-05 | APH1A                        | 8.43   | -1.17 | 5.44E-05 |
| EFS                          | 10.95  | -1.35 | 2.40E-05 | ARF6                         | 7.76   | -1.82 | 1.57E-06 |
| ERBB3                        | 9.88   | -1.12 | 1.56E-04 | ASAP2                        | 10.19  | -1.23 | 2.71E-05 |
| GFPT2                        | 9.78   | -1.81 | 1.72E-06 | BIRC2                        | 10.41  | -1.06 | 6.93E-05 |
| GHR                          | 6.97   | -1.38 | 2.74E-05 | BLOC1S2                      | 11.06  | -1.10 | 6.93E-05 |
| GOLM1                        | 8.60   | -1.84 | 4.79E-06 | BRCC3                        | 10.32  | -1.00 | 8.85E-04 |
| HK2                          | 10.12  | -1.32 | 5.80E-05 | C5ORF15                      | 11.31  | -2.00 | 5.42E-07 |
| KCNC1                        | 6.84   | -1.21 | 4.94E-05 | CABLES1                      | 8.01   | -1.11 | 6.54E-05 |
| KIF3B                        | 9.68   | -1.25 | 3.70E-05 | CBFB                         | 10.17  | -2.24 | 1.98E-07 |
| LRRC8B                       | 6.49   | -1.06 | 1.14E-04 | CREB5                        | 8.62   | -1.13 | 9.63E-05 |
| MAD2L1                       | 9.21   | -1.03 | 1.26E-04 | DPYSL2                       | 9.81   | -1.28 | 1.68E-05 |
| MSI2                         | 9.99   | -1.19 | 5.05E-05 | EIF4EBP2                     | 8.75   | -1.43 | 5.75E-06 |
| PC                           | 10.53  | -1.19 | 4.41E-05 | ERBB3                        | 9.88   | -1.41 | 1.74E-05 |
| PDPR                         | 8.45   | -1.55 | 1.05E-05 | ETNK1                        | 9.13   | -1.09 | 4.90E-05 |
| PNPO                         | 10.74  | -1.00 | 4.15E-03 | EXOC2                        | 6.74   | -1.01 | 1.51E-04 |
| QDPR                         | 8.99   | -1.04 | 4.98E-04 | FAM174B                      | 8.86   | -1.69 | 1.40E-06 |
| RARG                         | 10.30  | -1.59 | 6.68E-06 | FMNL2                        | 9.74   | -1.57 | 8.25E-06 |
| SERPINE1                     | 6.66   | -1.43 | 3.70E-05 | FSCN1                        | 13.75  | -3.24 | 3.35E-08 |
| SLC25A15                     | 8.77   | -1.06 | 9.14E-05 | G3BP1                        | 12.80  | -2.19 | 4.63E-07 |
| SLC35F1                      | 7.39   | -1.48 | 7.75E-06 | GABARAPL2                    | 9.73   | -1.93 | 1.10E-06 |
| SLC39A10                     | 8.40   | -1.52 | 7.75E-06 | GALNT1                       | 8.59   | -1.34 | 1.28E-05 |
| SLC39A11                     | 7.93   | -1.26 | 3.35E-05 | GMFB                         | 8.71   | -1.82 | 1.22E-06 |
| TERT                         | 7.44   | -1.07 | 3.18E-04 | GRB10                        | 11.17  | -1.39 | 6.25E-05 |
| TPM3                         | 12.64  | -2.03 | 7.16E-07 | HLTF                         | 9.16   | -1.26 | 1.77E-05 |
| TUB                          | 6.61   | -1.64 | 4.79E-06 | HMGB3                        | 7.94   | -2.13 | 3.61E-07 |
| UBE2E3                       | 9.79   | -1.04 | 1.60E-04 | HS6ST1                       | 8.38   | -1.29 | 1.78E-05 |
| UBXN2B                       | 7.60   | -1.06 | 8.51E-05 | ITGB8                        | 9.52   | -1.63 | 1.82E-06 |
| VASH1                        | 10.23  | -1.74 | 4.79E-06 | ITPRIPL2                     | 11.56  | -1.20 | 2.81E-05 |
| WWC3                         | 9.75   | -1.04 | 1.12E-04 | IVNS1ABP                     | 10.64  | -1.43 | 6.30E-06 |
|                              |        |       |          | KIAA0319L                    | 8.36   | -1.03 | 8.13E-05 |
|                              |        |       |          | KIFAP3                       | 12.32  | -1.04 | 1.07E-04 |
|                              |        |       |          | LHFPL2                       | 11.21  | -1.04 | 8.13E-05 |
|                              |        |       |          | LMNB2                        | 7.96   | -1.11 | 4.69E-05 |
|                              |        |       |          | MAP3K1                       | 12.26  | -1.18 | 2.77E-05 |
|                              |        |       |          | MAP3K11                      | 12.01  | -1.13 | 4.56E-04 |
|                              |        |       |          | MBD2                         | 10.53  | -1.11 | 5.48E-05 |

|          |       |       |          |
|----------|-------|-------|----------|
| MDFIC    | 7.89  | -1.73 | 2.26E-06 |
| MED13    | 10.11 | -1.25 | 2.32E-05 |
| MGAT4B   | 11.98 | -1.69 | 2.59E-06 |
| MOCS2    | 8.77  | -1.12 | 8.38E-05 |
| MPP5     | 9.88  | -1.18 | 3.85E-05 |
| MRPL17   | 11.19 | -1.50 | 3.69E-06 |
| MYO5A    | 9.72  | -2.07 | 2.49E-06 |
| NAP1L1   | 11.37 | -1.50 | 6.77E-06 |
| NDFIP2   | 10.04 | -1.44 | 5.23E-06 |
| NDUFA4   | 15.07 | -1.88 | 8.46E-07 |
| NFIB     | 8.57  | -1.08 | 9.54E-05 |
| NUAK1    | 8.39  | -1.22 | 2.43E-05 |
| NUDT3    | 8.25  | -1.29 | 1.55E-05 |
| OTOR     | 14.05 | -1.60 | 2.40E-06 |
| PAFAH1B2 | 10.81 | -1.63 | 2.45E-06 |
| PCBP2    | 7.63  | -1.82 | 1.22E-06 |
| PDCD4    | 8.79  | -1.77 | 1.40E-06 |
| PODXL    | 9.07  | -1.12 | 8.56E-05 |
| PPIP5K2  | 8.19  | -1.07 | 6.75E-05 |
| PPP3CA   | 8.43  | -1.22 | 3.00E-05 |
| PPP6C    | 6.49  | -1.01 | 1.38E-04 |
| PRKD3    | 9.26  | -1.82 | 7.71E-07 |
| RIN2     | 8.53  | -1.38 | 1.12E-05 |
| RNF170   | 7.87  | -1.54 | 3.82E-06 |
| SAP30L   | 7.20  | -1.10 | 4.57E-05 |
| SERINC5  | 6.96  | -1.47 | 4.83E-05 |
| SERPINE1 | 6.66  | -2.09 | 1.16E-06 |
| SIRPA    | 7.15  | -1.69 | 1.64E-06 |
| SLC26A2  | 13.07 | -2.69 | 5.27E-08 |
| SLC35B3  | 7.46  | -1.35 | 1.77E-05 |
| SLC7A8   | 8.83  | -1.21 | 1.89E-04 |
| SNTB2    | 10.06 | -1.20 | 4.68E-05 |
| SOX11    | 10.83 | -1.20 | 4.01E-05 |
| ST3GAL6  | 8.87  | -1.11 | 4.71E-05 |
| STC1     | 7.97  | -1.08 | 8.01E-05 |
| SWAP70   | 8.11  | -2.48 | 8.21E-08 |
| TAGLN2   | 10.49 | -1.15 | 6.26E-05 |
| TGFBR2   | 11.53 | -2.13 | 3.61E-07 |
| TPM3     | 12.64 | -1.65 | 1.72E-06 |
| TRIM2    | 8.90  | -2.47 | 8.21E-08 |
| TRIM44   | 10.01 | -1.16 | 8.07E-05 |
| TSPAN6   | 8.93  | -1.39 | 7.83E-06 |
| TULP4    | 12.85 | -1.04 | 7.27E-05 |
| UBXN4    | 8.00  | -1.03 | 1.35E-04 |
| UHMK1    | 10.08 | -1.97 | 7.41E-07 |
| USP13    | 8.44  | -1.02 | 3.89E-04 |
| UXS1     | 10.78 | -1.30 | 1.56E-05 |
| XRN1     | 8.28  | -1.08 | 1.00E-04 |
| YES1     | 8.72  | -1.07 | 1.07E-04 |
| ZBTB33   | 8.15  | -1.14 | 4.07E-05 |
| ZNF395   | 10.43 | -1.45 | 2.81E-05 |

**Appendix Table S3. List of the main predicted targets for miR-143-3p and miR-145-5p significantly downregulated following stable overexpression of the miR-143/145 cluster in human M238P melanoma cells using the bioinformatics tool miRonTop.**

M238P melanoma cells were transduced with a lentivirus containing the sequence of the miR-143/-145 cluster or a control vector. Expression profiles were determined with RNA-seq (Dataset 2). Predicted targets were obtained using the bioinformatics tool miRonTop (<https://www.genomique.info:8443/merge/index>) (Le Brigand et al., 2010) based on the Targetscan database (conserved sites) ([www.targetscan.org](http://www.targetscan.org)) (Agarwal et al., 2015) . Av.Exp: logarithm (base 2) of the base mean ; logFC: logarithm (base 2) of the ratio of miR-143/145 vs miR-Neg; Adj.pVal: Benjamini-Hochberg adjusted pValue. The thresholds used for the analysis are: Av.Exp >6, LogFC < -1 and adj.pVal < 0.05.

| miR-143-3p predicted targets |        |       |           | miR-145-5p predicted targets |        |       |           |
|------------------------------|--------|-------|-----------|------------------------------|--------|-------|-----------|
| Symbol                       | Av.Exp | LogFC | Adj.pVal  | Symbol                       | Av.Exp | LogFC | Adj.pVal  |
| ABHD14A                      | 7.25   | -1.14 | 6.76E-05  | ADAM19                       | 10.14  | -1.89 | 4.41E-06  |
| ADD3                         | 10.82  | -2.09 | 4.98E-30  | ADD3                         | 10.82  | -2.09 | 4.98E-30  |
| ARHGEF1                      | 11.64  | -1.82 | 1.81E-16  | ANGEL2                       | 10.17  | -1.20 | 2.09E-14  |
| ARID3B                       | 7.13   | -1.37 | 7.38E-04  | APH1A                        | 11.72  | -1.51 | 3.50E-11  |
| ASAP3                        | 7.48   | -2.16 | 1.00E-14  | ARHGAP6                      | 9.18   | -1.54 | 5.81E-16  |
| ATP10A                       | 8.13   | -2.71 | 1.28E-23  | ARL5B                        | 10.12  | -1.04 | 4.18E-03  |
| C6ORF62                      | 12.36  | -1.57 | 1.26E-11  | BIRC2                        | 11.56  | -1.01 | 6.51E-03  |
| CACHD1                       | 8.72   | -1.04 | 2.04E-05  | BRI3BP                       | 10.47  | -1.33 | 1.31E-06  |
| CBFB                         | 11.14  | -1.21 | 1.62E-10  | CACHD1                       | 8.72   | -1.04 | 2.04E-05  |
| CBX5                         | 11.96  | -1.31 | 9.33E-12  | CBFB                         | 11.14  | -1.21 | 1.62E-10  |
| CCDC58                       | 9.61   | -1.14 | 1.59E-11  | CCDC25                       | 10.50  | -1.14 | 2.07E-13  |
| CDK1                         | 11.27  | -6.95 | 7.39E-63  | CDCA3                        | 9.95   | -5.20 | 4.22E-10  |
| CHEK2                        | 9.20   | -1.42 | 9.90E-08  | CIRBP                        | 12.27  | -1.08 | 3.68E-08  |
| CREBL2                       | 10.44  | -1.87 | 3.55E-35  | CTNNBIP1                     | 10.23  | -1.52 | 3.10E-07  |
| CRELD1                       | 9.77   | -1.33 | 4.44E-13  | DUT                          | 10.91  | -1.70 | 7.63E-15  |
| DLK1                         | 11.42  | -1.82 | 4.37E-20  | EBF3                         | 10.22  | -1.48 | 7.80E-24  |
| EFS                          | 8.79   | -4.13 | 1.86E-15  | EFNA3                        | 6.54   | -1.12 | 1.93E-02  |
| ENPP1                        | 7.91   | -1.06 | 1.13E-03  | EFNB3                        | 7.73   | -1.35 | 7.93E-07  |
| EPM2AIP1                     | 10.44  | -1.28 | 6.68E-15  | ERBB3                        | 11.63  | -1.80 | 1.48E-10  |
| ERBB3                        | 11.63  | -1.80 | 1.48E-10  | ERMP1                        | 9.53   | -1.22 | 6.96E-06  |
| FSCN1                        | 12.78  | -4.76 | 5.76E-117 | ESCO2                        | 8.87   | -4.77 | 2.89E-42  |
| GOLM1                        | 11.67  | -1.01 | 5.90E-08  | FANCA                        | 9.74   | -3.04 | 4.08E-18  |
| GPR124                       | 10.05  | -1.01 | 2.90E-04  | FSCN1                        | 12.78  | -4.76 | 5.76E-117 |
| GXYLT1                       | 9.35   | -2.11 | 5.74E-18  | GABARAPL2                    | 10.90  | -1.13 | 7.04E-11  |
| HRK                          | 6.05   | -1.30 | 1.85E-02  | GGT7                         | 10.85  | -1.17 | 2.88E-14  |
| KCNC1                        | 7.55   | -1.13 | 3.12E-02  | GINS2                        | 9.33   | -3.03 | 1.66E-26  |
| MAD2L1                       | 10.49  | -5.17 | 1.12E-45  | GJA5                         | 6.41   | -1.48 | 3.18E-03  |
| MLLT3                        | 8.38   | -1.23 | 4.52E-05  | GMFB                         | 10.50  | -1.75 | 3.72E-12  |
| MRC2                         | 13.56  | -1.24 | 2.51E-20  | GOPC                         | 10.81  | -1.01 | 1.37E-10  |
| MYBL2                        | 10.77  | -5.37 | 1.21E-56  | GPRC5A                       | 12.72  | -1.54 | 1.85E-09  |
| NIPSNAP1                     | 11.31  | -1.74 | 3.66E-33  | GXYLT1                       | 9.35   | -2.11 | 5.74E-18  |
| PDGFRA                       | 9.39   | -1.60 | 9.54E-17  | H2AFX                        | 11.41  | -3.11 | 7.87E-16  |
| PGK1                         | 14.62  | -1.51 | 2.97E-11  | HELLS                        | 9.70   | -2.23 | 3.78E-24  |
| POC1A                        | 8.81   | -2.07 | 9.44E-07  | HHEX                         | 8.15   | -3.93 | 9.24E-09  |
| QDPR                         | 10.05  | -1.79 | 1.57E-27  | HMGB3                        | 10.48  | -1.52 | 5.46E-06  |
| RARG                         | 10.58  | -1.68 | 3.60E-16  | HOMER2                       | 8.19   | -1.04 | 5.66E-06  |
| SERPINE1                     | 11.06  | -1.86 | 4.90E-08  | KCNMB4                       | 6.38   | -1.32 | 8.59E-04  |
| SLC25A15                     | 9.46   | -1.01 | 1.69E-07  | KIAA1586                     | 8.57   | -1.25 | 1.60E-07  |
| SMARCD2                      | 11.49  | -1.49 | 1.55E-19  | LDLRAD3                      | 10.33  | -1.48 | 6.52E-16  |
| SOBP                         | 8.58   | -1.05 | 1.95E-03  | LMNB2                        | 12.26  | -1.95 | 1.32E-09  |
| STOX2                        | 7.49   | -1.39 | 3.71E-04  | MAP2K6                       | 6.84   | -1.81 | 3.16E-06  |

|           |       |       |          |
|-----------|-------|-------|----------|
| TERT      | 6.91  | -4.77 | 2.12E-15 |
| TIGD5     | 8.57  | -1.78 | 3.22E-07 |
| TMEM134   | 9.10  | -1.02 | 1.36E-05 |
| TNFRSF11A | 6.19  | -1.42 | 5.56E-04 |
| TPM3      | 13.36 | -2.41 | 1.19E-67 |
| TUB       | 8.43  | -3.22 | 2.37E-32 |
| UCK2      | 11.33 | -1.22 | 5.63E-15 |
| VASH1     | 9.32  | -1.10 | 8.57E-07 |
| VWA1      | 10.50 | -1.30 | 5.68E-11 |
| YIF1B     | 9.88  | -2.92 | 4.96E-25 |
| PHF6      | 10.39 | -1.88 | 5.45E-23 |

|            |       |       |          |
|------------|-------|-------|----------|
| MAP3K11    | 11.00 | -1.48 | 1.71E-09 |
| MDFIC      | 10.26 | -1.42 | 1.48E-07 |
| MEST       | 6.30  | -2.13 | 1.36E-02 |
| MGAT4B     | 12.19 | -1.01 | 2.66E-11 |
| MRPL17     | 10.93 | -1.13 | 2.99E-14 |
| NET1       | 10.54 | -1.69 | 3.35E-26 |
| NFIA       | 7.40  | -1.18 | 4.77E-05 |
| NINL       | 6.07  | -1.30 | 8.01E-03 |
| NUCKS1     | 13.57 | -1.42 | 3.35E-11 |
| NUDT3      | 10.73 | -1.49 | 3.70E-24 |
| OSBPL1A    | 10.04 | -1.10 | 7.70E-09 |
| P4HA1      | 12.29 | -1.09 | 5.23E-11 |
| PAN2       | 10.47 | -1.19 | 1.33E-10 |
| PCYT1B     | 7.18  | -1.49 | 2.16E-02 |
| PDCD4      | 11.46 | -1.09 | 3.03E-16 |
| PHB2       | 13.07 | -1.12 | 3.78E-09 |
| PI4K2B     | 9.26  | -1.17 | 2.27E-08 |
| PRKD3      | 12.05 | -1.40 | 1.57E-27 |
| PXN        | 13.96 | -1.03 | 7.17E-08 |
| RAD18      | 10.23 | -1.29 | 1.18E-16 |
| RNF170     | 8.88  | -1.57 | 1.30E-09 |
| RPA1       | 12.02 | -1.06 | 6.40E-09 |
| SCARB1     | 11.49 | -2.17 | 1.46E-23 |
| SERPINE1   | 11.06 | -1.86 | 4.90E-08 |
| SH3BP1     | 9.11  | -1.35 | 2.43E-09 |
| SIRPA      | 7.96  | -3.37 | 2.27E-28 |
| SLC25A36   | 11.80 | -1.03 | 7.87E-07 |
| SLC26A2    | 13.29 | -1.34 | 3.31E-07 |
| SLC7A8     | 10.72 | -1.70 | 1.04E-09 |
| SNTB2      | 11.57 | -1.22 | 2.64E-06 |
| SPTLC2     | 10.40 | -1.00 | 3.04E-09 |
| ST6GALNAC3 | 7.01  | -2.34 | 2.17E-12 |
| SWAP70     | 10.23 | -1.41 | 5.23E-18 |
| TBC1D14    | 11.97 | -1.58 | 3.82E-29 |
| TOMM40     | 11.53 | -1.01 | 5.41E-06 |
| TPM3       | 13.36 | -2.41 | 1.19E-67 |
| UBE2W      | 9.58  | -1.17 | 8.90E-04 |
| UBTF       | 11.92 | -1.07 | 8.03E-08 |
| USP13      | 10.13 | -1.35 | 7.70E-09 |
| UXS1       | 11.65 | -1.00 | 1.44E-03 |
| VASN       | 6.38  | -1.92 | 7.67E-07 |
| ZBTB8A     | 6.47  | -1.30 | 1.37E-03 |
| ZNF395     | 9.84  | -1.46 | 4.73E-11 |

**Appendix Table S4. Human primers sequences used in the study.**

| <b>Gene</b> | <b>Forward</b>         | <b>Reverse</b>          |
|-------------|------------------------|-------------------------|
| ACTA2       | CTGTTCCAGCCATCCTTCAT   | TCATGATGCTGTTGTAGGTGGT  |
| AMOTL2      | GCGACTGTCAGAACAACCTGC  | GCACCTTTAACCTGCTTTCCA   |
| AXL         | GTGGGCAACCCAGGGAATATC  | GTA CTGTCCC GTGTCGGAAAG |
| COL1A1      | GGGATTCCCTGGACCTAAAG   | GGAACACCTCGCTCTCCA      |
| COL1A2      | GTTGCTGCTTG CAGTAACCTT | AGGGCCAAGTCCA ACTCCTT   |
| CTGF        | ACCGACTGGAAGACACGTTTG  | CCAGGTCAGCTTCGCAAGG     |
| CYR61       | TGAAGCGGCTCCCTGTTTT    | CGGGTTTCTTTCACAAGGCG    |
| FN1         | TGTTATGGAGGAAGCCGAGGTT | GCAGCGGTTTGCGATGGT      |
| FSCN1       | CCAGCTGCTACTTTGACATCGA | GCTCTGAGTCCCCTGCTGTCT   |
| GDNF        | GGCAGTGCTTCCTAGAAGAGA  | AAGACACAACCCCGTTTTTTG   |
| LOX         | CGACCCTTACAACCCCTACA   | AAGTAGCCAGTGCCGTATCC    |
| LOXL2       | CCTGGGGAGAGGACATACAA   | CTCGCAGGTGACATTCTTCA    |
| MYL9        | CATCCATGAGGACCACCTCCG  | CTGGGGTGGCCTAGTCGTC     |
| RPL32       | CCTTGTGAAGCCCAAGATCG   | TGCCGGATGAACTTCTTGGT    |
| TAGLN2      | ATGGCACGGTGCTATGTGAG   | CCCACCCAGATTCATCAGCG    |
| THBS1       | AGACTCCGCATCGAAAGG     | TCACCACGTTGTTGTCAAGGG   |
| TNC         | TCCCAGTGTTCCGGTGGATCT  | TTGATGCGATGTGTGAAGACA   |

**Appendix Table S5. Mouse primers sequences used in the study.**

| <b>Gene</b> | <b>Forward</b>          | <b>Reverse</b>         |
|-------------|-------------------------|------------------------|
| Acta2       | CCCAGACATCAGGGAGTAATGG  | TCTATCGGATACTTCAGCGTCA |
| Amotl2      | AGGGACAATGAGCGATTGCAG   | CCTCACGCTTGGAAGAGGT    |
| Col1a1      | GCTCCTCTTAGGGGCCACT     | ATTGGGGACCCTTAGGCCAT   |
| Ctgf        | GGCCTCTTCTGCGATTTTCG    | GCAGCTTGACCCTTCTCGG    |
| Cyr61       | TAAGGTCTGCGCTAAACAACCTC | CAGATCCCTTTCAGAGCGGT   |
| Fn1         | ATGTGGACCCCTCCTGATAGT   | GCCCAGTGATTTTCAGCAAAGG |
| Myl9        | AGAGGGCTACGTCCAATGTCT   | CTCCAGATACTCGTCTGTGGG  |
| Rpl32       | AAAAACAGACGCACCATCGAA   | TTCAGGTGACCACATTCAGGG  |
| Tagln2      | GCTATGGCATTAAACACCACGG  | CCCAGGTTTCATTAGTGTCCGC |
| Tnc         | TTTGCCCTCACTCCCGAAG     | AGGGTCATGTTTAGCCCACTC  |

**Appendix Table S6. List of antibodies used in the study.**

| <b>Primary Antibody</b>                       | <b>Company</b>    | <b>Catalog Number</b> | <b>Dilution</b>    |
|-----------------------------------------------|-------------------|-----------------------|--------------------|
| p-AKT (Ser473)                                | Cell Signaling    | 9271                  | WB 1:1000          |
| AKT (pan)                                     | Cell Signaling    | 4691                  | WB 1:1000          |
| $\alpha$ SMA                                  | Abcam             | ab5694                | WB 1:1000          |
| AXL                                           | Cell Signaling    | 4566                  | WB 1:1000          |
| CDK2                                          | Santa Cruz        | sc-6248               | WB 1:500           |
| COL1                                          | Abcam             | ab34710               | WB 1:3000          |
| CCND1                                         | BD Biosciences    | 556470                | WB 1:1000          |
| E2F1                                          | Cell Signaling    | 3742                  | WB 1:1000          |
| EGFR                                          | Santa Cruz        | sc-373746             | WB 1:500           |
| p-ERK1/2<br>(Thr202/Tyr204)                   | Cell Signaling    | 9101                  | WB 1:1000          |
| ERK2                                          | Santa Cruz        | sc-1647               | WB 1:500           |
| FAK                                           | Upstate           | 05-182                | WB 1:1000          |
| p-FAK (Tyr397)                                | Cell Signaling    | 3283                  | WB 1:500           |
| FN1                                           | Santa Cruz        | sc-8422               | WB 1:500, IF 1:100 |
| FSCN1                                         | Santa Cruz        | sc-21743              | IF 1:100           |
| FSCN1                                         | Proteintech       | 66321-1-Ig            | WB 1:1000          |
| HSP60                                         | Santa Cruz        | sc-57840              | WB 1:500           |
| HSP90                                         | Santa Cruz        | sc-13119              | WB 1:500           |
| LOX                                           | Novus Biologicals | NB100-2527SS          | WB 1:1000          |
| LOXL2                                         | R&D Systems       | AF2639                | WB 1:1000          |
| MITF                                          | Sigma             | HPA003259             | WB 1:1000          |
| MLC2                                          | Cell Signaling    | 3672                  | WB 1:1000          |
| p-MLC2 (Thr18/Ser19)                          | Cell Signaling    | 3674                  | WB 1:500           |
| MRTFA                                         | Santa Cruz        | sc-390324             | IF 1:100           |
| NGFR (p75NTR)                                 | Cell Signaling    | 8238                  | WB 1:1000          |
| p27 Kip1                                      | Cell Signaling    | 3686                  | WB 1:1000          |
| Paxillin                                      | BD Biosciences    | P13520                | WB 1:3000          |
| p-Paxillin (Tyr118)                           | Cell Signaling    | 2541                  | WB 1:1000 IF 1:50  |
| p-PDGFR $\beta$ (Tyr1009)                     | Cell Signaling    | 3124                  | WB 1:500           |
| PDGFR $\beta$                                 | Santa Cruz        | sc-374573             | WB 1:500           |
| p-Rb                                          | Cell Signaling    | 9308                  | WB 1:1000          |
| Rb                                            | Cell Signaling    | 9309                  | WB 1:1000          |
| p-SMAD3<br>(Ser433/435)/SMAD1<br>(Ser463/465) | Cell Signaling    | 9514                  | WB 1:1000          |
| SMAD1/2/3                                     | Santa Cruz        | sc-7960               | WB 1:500           |
| SOX9                                          | Santa Cruz        | sc-166505             | WB 1:500           |
| SOX10                                         | Cell Signaling    | 89356                 | WB 1:1000          |
| pSrc family (Tyr416)                          | Cell Signaling    | 6943                  | WB 1:1000          |
| Src                                           | Cell Signaling    | 2109                  | WB 1:1000          |
| STAT3                                         | Cell Signaling    | 9139                  | WB 1:1000          |
| p-STAT3 (Tyr705)                              | Cell Signaling    | 9145                  | WB 1:1000          |
| Survivin                                      | Cell Signaling    | 2808                  | WB 1:1000          |
| TAGLN2                                        | Genetex           | GTX115082             | WB 1:1000          |
| THBS1                                         | Santa Cruz        | sc-393504             | WB 1:500           |
| TNC                                           | R&D Systems       | AF3358                | WB 1:1000          |
| YAP                                           | Cell Signaling    | 14074                 | IF 1:200           |



| <b>Secondary Antibody</b>            | <b>Company</b> | <b>Catalog Number</b> | <b>Dilutions</b> |
|--------------------------------------|----------------|-----------------------|------------------|
| Anti-mouse IgG, HRP-linked antibody  | Cell Signaling | 7076                  | WB 1:2000        |
| Anti-rabbit IgG, HRP-linked antibody | Cell Signaling | 7074                  | WB 1:2000        |
| Anti-goat IgG, HRP-linked antibody   | Santa Cruz     | sc-2354               | WB 1:5000        |
| Goat- anti-mouse, Alexa Fluor® 488   | Invitrogen     | A11001                | IF 1:200         |
| Goat anti-mouse, Alexa Fluor® 594    | Invitrogen     | A11005                | IF 1:200         |
| Goat anti-rabbit, Alexa Fluor® 594   | Invitrogen     | A11012                | IF 1:200         |

**Appendix Table S7. Exact P Values obtained for the statistical analyses provided in the main figures.**

**Figure 1B:**

|                                    |        |
|------------------------------------|--------|
| BRAFi/MEKi vs<br>BRAFi/MEKi + BIBF | 0.0023 |
|------------------------------------|--------|

**Figure 1C:**

|                                    |         |
|------------------------------------|---------|
| BRAFi/MEKi vs<br>BRAFi/MEKi + BIBF | <0.0001 |
|------------------------------------|---------|

**Figure 1F:**

|                                 |         |
|---------------------------------|---------|
| BRAFi/MEKi vs Ctrl              | <0.0001 |
| BRAFi/MEKi + BIBF vs Ctrl       | 0.0001  |
| BRAFi/MEKi + BIBF vs BRAFi/MEKi | 0.0015  |

**Figure 1J:**

|                                 |         |
|---------------------------------|---------|
| BRAFi/MEKi vs Ctrl              | <0.0001 |
| BIBF vs Ctrl                    | <0.0001 |
| BRAFi/MEKi + BIBF vs Ctrl       | <0.0001 |
| BRAFi/MEKi + BIBF vs BRAFi/MEKi | <0.0001 |

**Figure 2B:**

|                                                               |        |
|---------------------------------------------------------------|--------|
| miR-143 fold change expression BIBF vs Ctrl                   | 0.6855 |
| miR-143 fold change expression BRAFi/MEKi vs Ctrl             | 0.0026 |
| miR-143 fold change expression BRAFi/MEKi+ BIBF vs Ctrl       | 0.9995 |
| miR-143 fold change expression BRAFi/MEKi+ BIBF vs BRAFi/MEKi | 0.0029 |
| miR-145 fold change expression BIBF vs Ctrl                   | 0.7698 |
| miR-145 fold change expression BRAFi/MEKi vs Ctrl             | 0.0003 |
| miR-145 fold change expression BRAFi/MEKi+ BIBF vs Ctrl       | 0.9651 |
| miR-145 fold change expression BRAFi/MEKi+ BIBF vs BRAFi/MEKi | 0.0005 |

**Figure 2C:**

|                                                               |         |
|---------------------------------------------------------------|---------|
| miR-143 fold change expression BIBF vs Ctrl                   | 0.7423  |
| miR-143 fold change expression BRAFi/MEKi vs Ctrl             | <0.0001 |
| miR-143 fold change expression BRAFi/MEKi+ BIBF vs Ctrl       | 0.0237  |
| miR-143 fold change expression BRAFi/MEKi+ BIBF vs BRAFi/MEKi | 0.2027  |
| miR-145 fold change expression BIBF vs Ctrl                   | 0.9601  |
| miR-145 fold change expression BRAFi/MEKi vs Ctrl             | <0.0001 |
| miR-145 fold change expression BRAFi/MEKi+ BIBF vs Ctrl       | 0.9997  |
| miR-145 fold change expression BRAFi/MEKi+ BIBF vs BRAFi/MEKi | <0.0001 |

**Figure 2D:**

|                                                    |        |
|----------------------------------------------------|--------|
| miR-143 fold change expression TGF $\beta$ vs Ctrl | 0.0344 |
| miR-143 fold change expression PDGF-BB vs Ctrl     | 0.0006 |
| miR-145 fold change expression TGF $\beta$ vs Ctrl | 0.0006 |
| miR-145 fold change expression PDGF-BB vs Ctrl     | 0.0305 |

**Figure 2E:**

|                                             |        |
|---------------------------------------------|--------|
| miR-143 fold change expression SB vs Ctrl   | 0.0089 |
| miR-143 fold change expression BIBF vs Ctrl | 0.0177 |
| miR-143 fold change expression GSK vs Ctrl  | 0.0004 |
| miR-145 fold change expression SB vs Ctrl   | 0.0129 |
| miR-145 fold change expression BIBF vs Ctrl | 0.0138 |
| miR-145 fold change expression GSK vs Ctrl  | 0.028  |

**Figure 3B:**

|                                   |        |
|-----------------------------------|--------|
| MYL9 BRAFi LNA-143 vs BRAFi       | 0.0245 |
| MYL9 BRAFi LNA-145 vs BRAFi       | 0.0007 |
| MYL9 BRAFi LNA-143/145 vs BRAFi   | 0.0013 |
| FN1 BRAFi LNA-143 vs BRAFi        | 0.0168 |
| FN1 BRAFi LNA-145 vs BRAFi        | 0.0035 |
| FN1 BRAFi LNA-143/145 vs BRAFi    | 0.0075 |
| ACTA2 BRAFi LNA-143 vs BRAFi      | 0.0038 |
| ACTA2 BRAFi LNA-145 vs BRAFi      | 0.0004 |
| ACTA2 BRAFi LNA-143/145 vs BRAFi  | 0.0009 |
| COL1A1 BRAFi LNA-143 vs BRAFi     | 0.0430 |
| COL1A1 BRAFi LNA-145 vs BRAFi     | 0.0043 |
| COL1A1 BRAFi LNA-143/145 vs BRAFi | 0.0075 |
| LOXL2 BRAFi LNA-143 vs BRAFi      | 0.0295 |
| LOXL2 BRAFi LNA-145 vs BRAFi      | 0.0017 |
| LOXL2 BRAFi LNA-143/145 vs BRAFi  | 0.0041 |
| THBS1 BRAFi LNA-143 vs BRAFi      | 0.7806 |
| THBS1 BRAFi LNA-145 vs BRAFi      | 0.0036 |
| THBS1 BRAFi LNA-143/145 vs BRAFi  | 0.0200 |

**Figure 3E:**

|                       |         |
|-----------------------|---------|
| miR-143-3p vs miR-neg | <0.0001 |
| miR-145-5p vs miR-neg | <0.0001 |

**Figure 3F:**

|                       |        |
|-----------------------|--------|
| miR-143-3p vs miR-neg | 0.0001 |
| miR-145-5p vs miR-neg | 0.0153 |

**Figure 3H:**

|                            |         |
|----------------------------|---------|
| BRAFi vs LNA Ctrl          | <0.0001 |
| BRAFi LNA-143 vs BRAFi     | <0.0001 |
| BRAFi LNA-145 vs BRAFi     | <0.0001 |
| BRAFi LNA-143/145 vs BRAFi | <0.0001 |

**Figure 4F:**

|                        |         |
|------------------------|---------|
| WT miR-143 vs miR-neg  | 0.0010  |
| WT miR-145 vs miR-neg  | <0.0001 |
| Mut miR-143 vs miR-neg | 0.5301  |
| Mut miR-145 vs miR-neg | 0.2430  |

**Figure 4G:**

|                    |        |
|--------------------|--------|
| miR-143 vs miR-neg | 0.0041 |
| miR-145 vs miR-neg | 0.0007 |

**Figure 5A:**

|                     |        |
|---------------------|--------|
| FSCN1 BRAFi vs Ctrl | 0.0002 |
|---------------------|--------|

|                          |         |
|--------------------------|---------|
| BRAFi vs Ctrl miR-143-3p | <0.0001 |
| BRAFi vs Ctrl miR-145-p  | 0.0003  |

**Figure 5B:**

|                            |         |
|----------------------------|---------|
| BRAFi LNA-143 vs BRAFi     | <0.0001 |
| BRAFi LNA-145 vs BRAFi     | <0.0001 |
| BRAFi LNA-143/145 vs BRAFi | <0.0001 |

**Figure 5D:**

|                     |        |
|---------------------|--------|
| siFSCN1#1 vs siCTRL | 0.0009 |
| siFSCN1#2 vs siCTRL | 0.0397 |

**Figure 5F:**

|                           |         |
|---------------------------|---------|
| Lenti-FSCN1 vs Lenti-Ctrl | <0.0001 |
|---------------------------|---------|

**Figure 5H:**

|                                      |         |
|--------------------------------------|---------|
| Lenti-FSCN1 vs Lenti-Ctrl 5 $\mu$ M  | <0.0001 |
| Lenti-FSCN1 vs Lenti-Ctrl 10 $\mu$ M | <0.0001 |
| Lenti-FSCN1 vs Lenti-Ctrl 20 $\mu$ M | <0.0001 |
| Lenti-FSCN1 vs Lenti-Ctrl 30 $\mu$ M | <0.0001 |

**Figure 6A:**

|                       |         |
|-----------------------|---------|
| miR-143-3p vs miR-neg | <0.0001 |
| miR-145-5p vs miR-neg | <0.0001 |

**Figure 6B:**

|                       |         |
|-----------------------|---------|
| miR-143-3p vs miR-neg | <0.0001 |
| miR-145-5p vs miR-neg | <0.0001 |

**Figure 6C:**

|                       |         |
|-----------------------|---------|
| miR-143-3p vs miR-neg | 0.0393  |
| miR-145-5p vs miR-neg | <0.0001 |

**Figure 6D:**

|                       |         |
|-----------------------|---------|
| miR-143-3p vs miR-neg | <0.0001 |
| miR-145-5p vs miR-neg | 0.0002  |

**Figure 6E:**

|                       |         |
|-----------------------|---------|
| miR-143-3p vs miR-neg | <0.0001 |
| miR-145-5p vs miR-neg | <0.0001 |

**Figure 6F:**

|                       |         |
|-----------------------|---------|
| miR-143-3p vs miR-neg | <0.0001 |
| miR-145-5p vs miR-neg | <0.0001 |

**Figure 7A:**

|                       |         |
|-----------------------|---------|
| miR-143-3p vs miR-neg | <0.0001 |
| miR-145-5p vs miR-neg | <0.0001 |

**Figure 7B:**

|                    |         |
|--------------------|---------|
| BRAFi vs Ctrl      | <0.0001 |
| BRAFi/MEKi vs Ctrl | <0.0001 |

**Figure 7C:**

|                       |         |
|-----------------------|---------|
| miR-143-3p vs miR-neg | <0.0001 |
| miR-145-5p vs miR-neg | <0.0001 |

**Figure 7D:**

|                    |         |
|--------------------|---------|
| BRAFi vs Ctrl      | 0.0002  |
| BRAFi/MEKi vs Ctrl | <0.0001 |

**Figure 7E:**

|                              |         |
|------------------------------|---------|
| CYR61 miR-143-3p vs miR-neg  | <0.0001 |
| CYR61 miR-145-5p vs miR-neg  | 0.0034  |
| CTGF miR-143-3p vs miR-neg   | 0.0043  |
| CTGF miR-145-5p vs miR-neg   | 0.0378  |
| AMOTL2 miR-143-3p vs miR-neg | 0.0218  |
| AMOTL2 miR-145-5p vs miR-neg | 0.0180  |
| AXL miR-143-3p vs miR-neg    | 0.0158  |
| AXL miR-145-5p vs miR-neg    | 0.0013  |

**Figure 7F:**

|                     |         |
|---------------------|---------|
| siFSCN1#1 vs siCtrl | <0.0001 |
| siFSCN1#2 vs siCtrl | <0.0001 |

**Figure 7G:**

|                     |         |
|---------------------|---------|
| siFSCN1#1 vs siCtrl | 0.0004  |
| siFSCN1#2 vs siCtrl | <0.0001 |

**Figure 7H:**

|                            |        |
|----------------------------|--------|
| CYR61 siFSCN1#1 vs siCtrl  | 0.0012 |
| CYR61 siFSCN1#2 vs siCtrl  | 0.0013 |
| CTGF siFSCN1#1 vs siCtrl   | 0.0048 |
| CTGF siFSCN1#2 vs siCtrl   | 0.0023 |
| AMOTL2 siFSCN1#1 vs siCtrl | 0.0128 |
| AMOTL2 siFSCN1#2 vs siCtrl | 0.0039 |
| THBS1 siFSCN1#1 vs siCtrl  | 0.0007 |
| THBS1 siFSCN1#2 vs siCtrl  | 0.0453 |

**References:**

Agarwal V, Bell GW, Nam JW, Bartel DP. Predicting effective microRNA target sites in mammalian mRNAs. *Elife*. 2015;4.

Le Brigand K, Robbe-Sermesant K, Mari B, Barbry P. MiRonTop: mining microRNAs targets across large scale gene expression studies. *Bioinformatics*. 2010;26(24):3131-2.
